# Supplementary material for: A comparison between a maximum care university hospital and an outpatient clinic – potential for optimization in arthroscopic workflows?
Source: Springer Nature journal article supplement (doi:10.1186/s12913-023-10259-3), 2023-11-28
Supplement: MOESM1 [file 26368928]

## Supplementary Material

### A. Average duration of phases and actions and average number of occurrences per intervention

Table 1 - Average duration of phases and actions and average number of occurrences per intervention

|                                         | UH              | OC            | p values |
|-----------------------------------------|-----------------|---------------|----------|
| <b>Phases (min)</b>                     |                 |               |          |
| Preoperative                            | 30,79 ± 9,19    | 26,02 ± 13,99 | p<0,05   |
| Postoperative                           | 15,07 ± 9,93    | 9,93 ± 3,71   | p<0,001  |
| Changeover time                         | 32,55 ± 7,58    | 6,03 ± 8,05   | p<0,001  |
| Closure-to-Incision-Time                | 80,03 ± 11,73   | 41,20 ± 18,79 | p<0,001  |
| Anaesthesia-Ready-to-Incision-Time      | 31,58 ± 9,74    | 18,03 ± 8,44  | p<0,001  |
| <b>Actions (min)</b>                    |                 |               |          |
| Positioning Patient                     | 9,40 ± 5,60     | 2,73 ± 2,24   | p<0,001  |
| <b>Actions (sec)</b>                    |                 |               |          |
| Providing inside OR (per intervention)  | 124,52 ± 117,35 | 20,61 ± 30,50 | p<0,001  |
| Providing outside OR (per intervention) | 194,86 ± 216,22 | 15,83 ± 36,96 | p<0,001  |
| Providing inside OR (per action)        | 25,48 ± 38,98   | 22,83 ± 14,03 | p=0,6    |
| Providing outside OR (per action)       | 64,54 ± 61,10   | 40,19 ± 32,28 | p<0,05   |
| <b>Ocurrences (n)</b>                   |                 |               |          |
| Additional tools                        | 5.45 ± 4.20     | 1.18 ± 1.48   | p<0,001  |
| Defective tools                         | 0.98 ± 1.09     | 0.11 ± 0.31   | p<0,001  |
| Opening instrument set                  | 0.28 ± 0.68     | 0.02 ± 0.21   | p<0,001  |
| Provisions inside OR                    | 4.89 ± 3.75     | 0.91 ± 1.48   | p<0,001  |
| Provisions outside OR                   | 3.02 ± 2.46     | 0.39 ± 0.67   | p<0,001  |
| Calls total                             | 4.53 ± 3.44     | 0.11 ± 0.31   | p<0,001  |
| Calls surgeon                           | 1.66 ± 1.85     | 0.05 ± 0.27   | p<0,001  |
| Calls surgeon sterile coated            | 0.25 ± 0,55     | 0.02 ± 0,12   | p<0,005  |





#### D. Definition of phases and actions

| <b>Phase</b>                              | <b>Start</b>                                                      | <b>End</b>                                                                       |
|-------------------------------------------|-------------------------------------------------------------------|----------------------------------------------------------------------------------|
| Preoperative                              | Patient arrives in the operating theatre before the intervention. | Skin incision.                                                                   |
| Postoperative                             | End of the last suture.                                           | Patient leaves the operating theatre after the intervention.                     |
| Changeover time                           | Patient of the accomplished intervention leaves the OR.           | Patient of the following intervention arrives in the OR before the intervention. |
| Closure-to-Incision-Time                  | End of the last suture of the accomplished intervention.          | Skin incision in the following intervention.                                     |
| Anesthesia-Ready-to-Incision-Time         | Anesthetic preparation is complete and the patient is released.   | Skin incision.                                                                   |
| Intraoperative (Incision-to-Closure time) | Skin incision.                                                    | End of last suture.                                                              |

| <b>Action</b>        | <b>Start</b>                                                                                                          | <b>End</b>                                                                     |
|----------------------|-----------------------------------------------------------------------------------------------------------------------|--------------------------------------------------------------------------------|
| Positioning Patient  | First sub action to position the patient (often starting with the positioning of the patient on the operation table). | End of the last sub action to position the patient (fixation of the position). |
| Providing inside OR  | The assistant moves to provide an instrument from inside of the OR.                                                   | The instrument is handed over to the sterile assistant.                        |
| Providing outside OR | The assistant moves to provide an instrument from outside of OR.                                                      | The instrument is handed over to the sterile assistant.                        |
| Skin incision        | The scalpel cuts through the skin.                                                                                    | The scalpel is removed from the skin.                                          |
| Suturing             | Starts with the first stitch of a needle.                                                                             | Ends with the last cut of the suture.                                          |
| Wound dressing       | Put on the wound dressing material.                                                                                   | Fixation of the wound dressing.                                                |
